# Supplementary material
Source: PubMed Central journal article supplement (PMC1955115)

# Supplementary Figure 1. Tao *et al.*

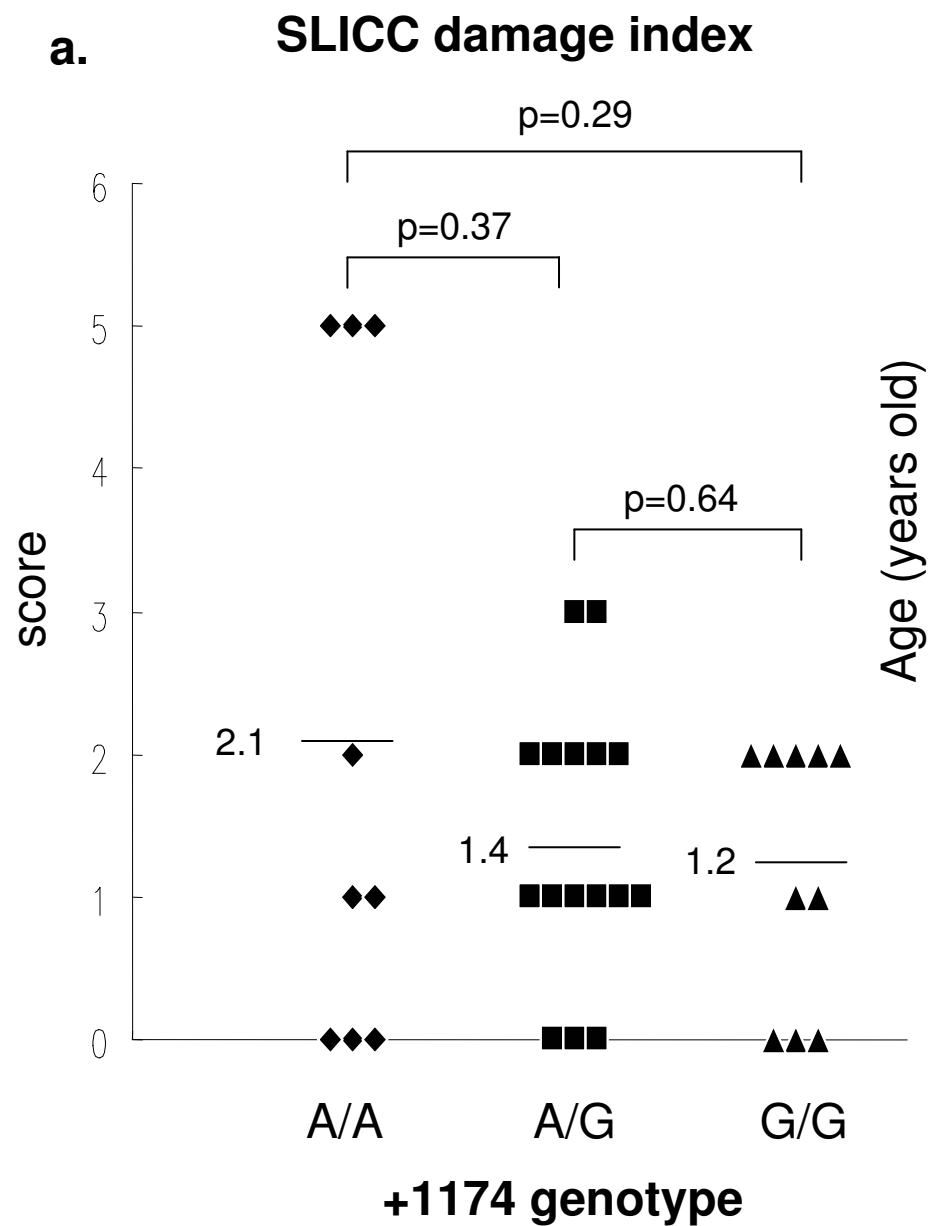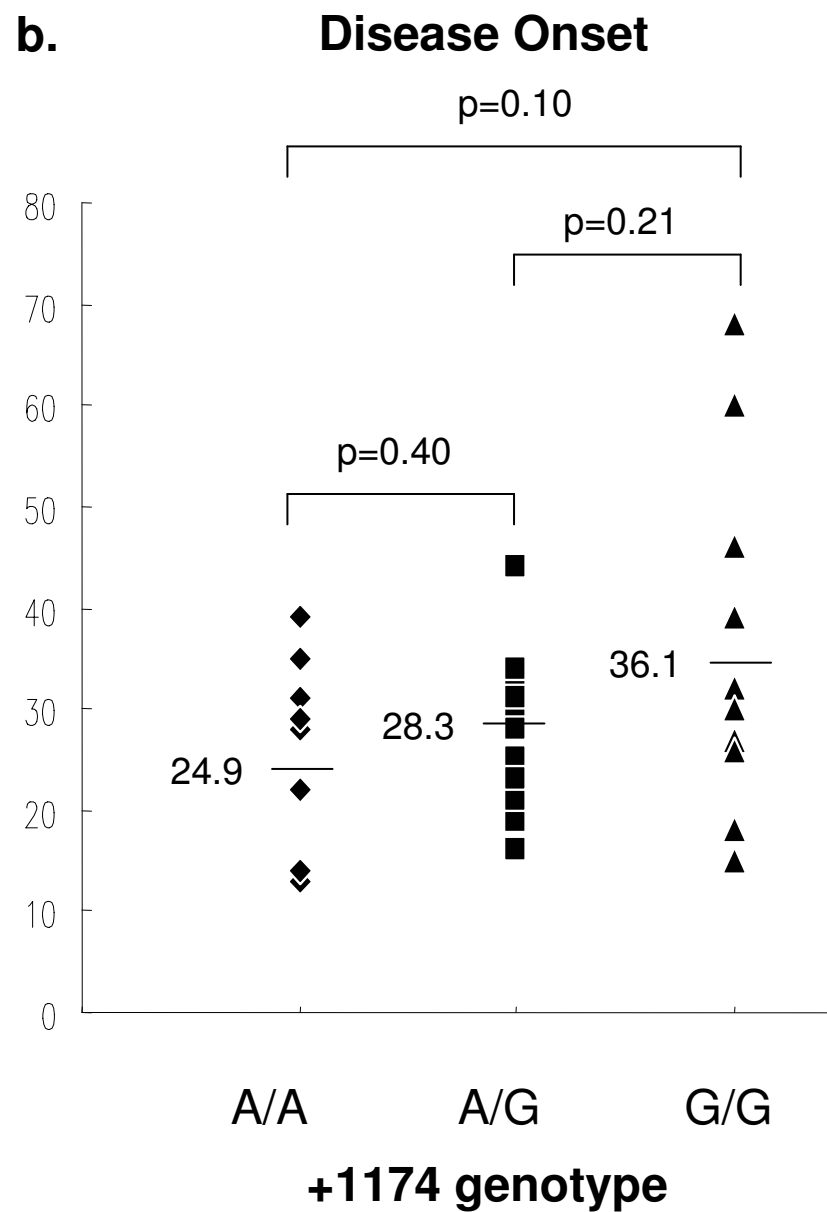

Supplement: annrheumd_ard.2006.065961_1.pdf [file annrheumd_ard.2006.065961_1.pdf]
